# Supplementary material for: Engineered extracellular vesicles encapsulated Bryostatin-1 as therapy for neuroinflammation
Source: Royal Society of Chemistry journal article supplement (doi:10.1039/d1nr05517h), 2022-01-01
Supplement: d1nr05517h1.pdf [file d1nr05517h1.pdf]

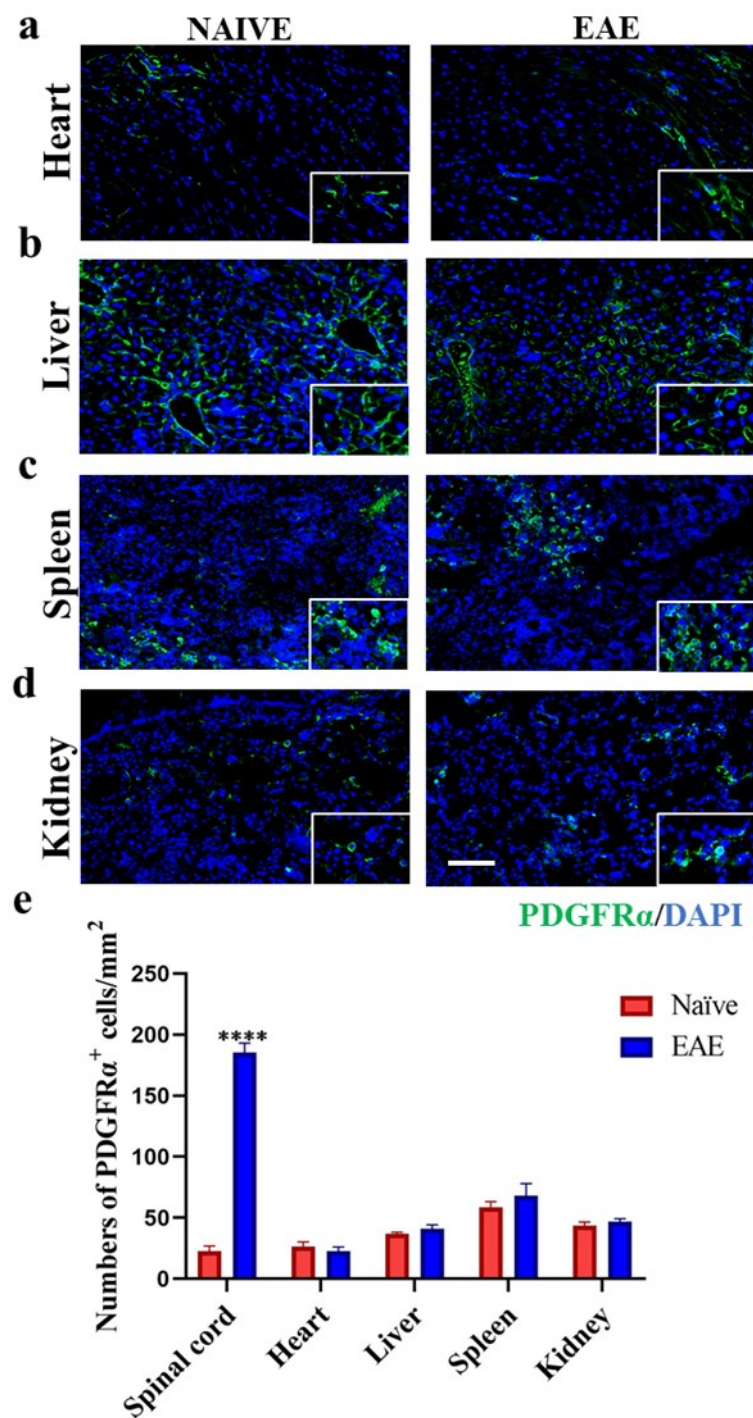

1

2 **Sup Fig 1. Expression of PDGFR $\alpha$  in other tissues.** Immunostaining for PDGFR $\alpha$  in (a) Heart, (b)  
3 Liver, (c) Spleen, and (g) Kidney with Naïve and EAE mice. Scale bar = 100  $\mu$ m. (e) Quantification  
4 the numbers of PDGFR<sup>+</sup> cells from Heart, Liver, Spleen, and Kidney. Student t-tests were used to  
5 determine p values.

6

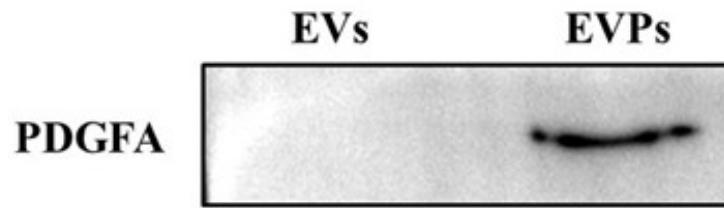

7  
8 **Sup Fig 2. Expression of PDGFA in EVs/EVPs.** Western blot analysis of EVs and EVPs from  
9 NSCs.  
10

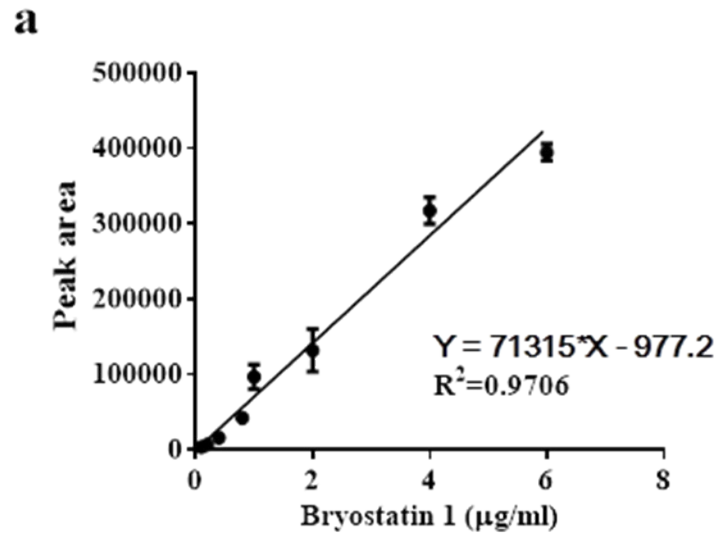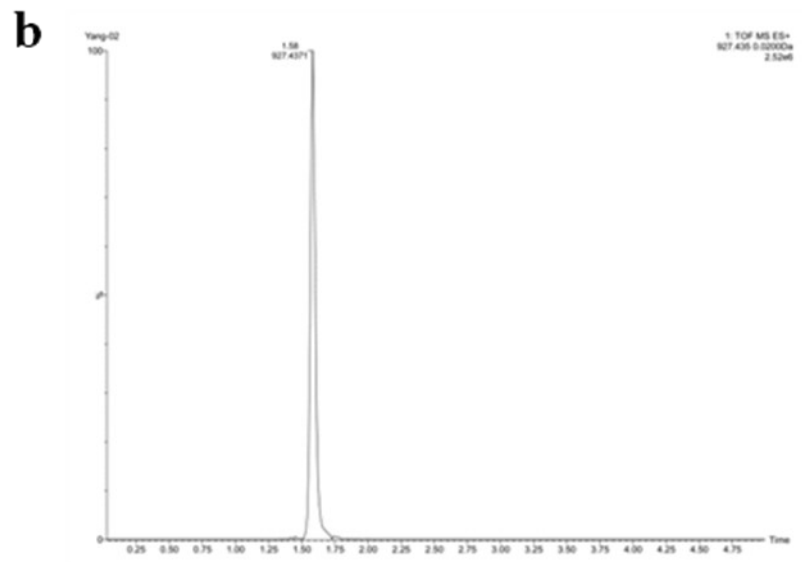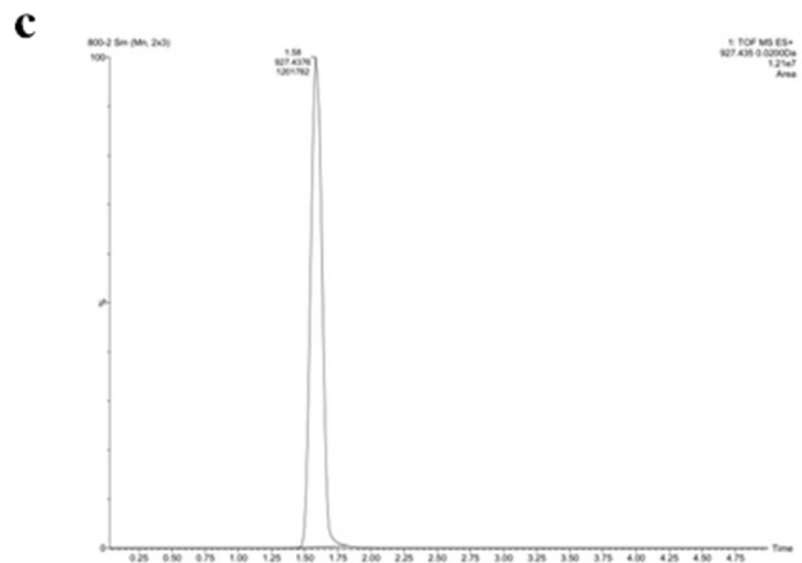

11

12 **Sup Fig 3. The amount of Bryo-1 encapsulated into EVs/EVPs was assessed by UHPLC-Q-TOF-**

13 **MS. All analyses were performed using a C18 column with a mobile phase of acetonitrile-water (90:10,**

14 v/v) containing 0.1% formic acid and delivered at a flow rate of 0.4 mL/min at 30°C. The standard curve  
15 of Bryo-1 is shown in (a), and the typical HPLC profile for Bryo-1 extracted from EVs/EVPs (b) and  
16 Bryo-1 standards (c) are shown here.

17

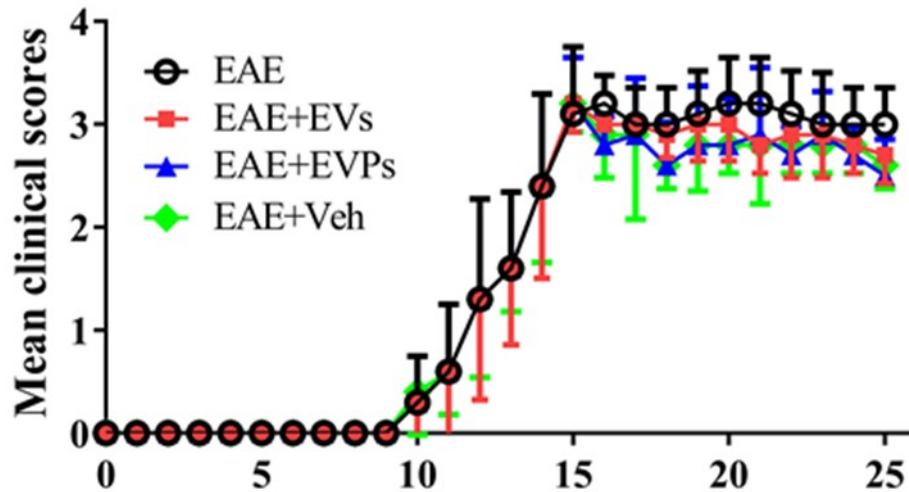

18

19 **Sup Fig 4. Therapeutic effect of EVs and EVPs on EAE.** EAE mice were injected i.v. with PBS, EVs  
20 and EVPs ( $1 \times 10^8$  particles) at disease peak (day 14 p.i.) every 3 days. Mice were scored daily, in a blinded  
21 fashion, by two researchers for disease severity according to a 0–5 scale. Data are shown as mean values  
22  $\pm$  SD (n = 5 each group) and are a representative of two experiments.

23

24

25

26

27

28

29

30

31

32

33

34

35 **Supplementary Table 1**

| <b>Clinical Information</b> |                                                 |                 |            |            |                  |                  |               |
|-----------------------------|-------------------------------------------------|-----------------|------------|------------|------------------|------------------|---------------|
| <b>RMMSc #</b>              | <b>Tissue</b>                                   | <b>Slice #</b>  | <b>Sex</b> | <b>Age</b> | <b>Autopsy #</b> | <b>PMI(hrs )</b> | <b>Sample</b> |
| 260                         | Brain                                           | 8               | M          | 55         | A06-14           | NA               | MS            |
| 239                         | Brain                                           | Coronal Section | M          | 49         | A04-33           | NA               | MS            |
| 344                         | Snap frozen Rt. Temporal plaque (1)             | 7               | F          | 64         | A10-149          | 5.5              | MS            |
| 344                         | Brain                                           | 9               | F          | 64         | A10-149          | 5.5              | MS            |
| 301                         | Brain                                           | Number unknown  | F          | 60         | AC08-117         | NA               | MS            |
| 252                         | Brain                                           | 3               | F          | 64         | AC08-62          | 4                | MS            |
| 252                         | Snap frozen periventricular (1) and pons plaque |                 | F          | 64         | AC08-62          | 4                | MS            |

36

37 **Supplementary Table 2**

| <b>Primers for PCR</b> |                           |                           |
|------------------------|---------------------------|---------------------------|
| <b>Gene</b>            | <b>Forward(5'-3')</b>     | <b>Reverse(5'-3')</b>     |
| PDGFA                  | ACTTCTAGAATGAGGACCTGGGCTT | CTTGAATTCTCACCTCACATCTGTC |
|                        | GCCT                      | TCCT                      |

38

39 **Supplementary Table 3**

| <b>Primers for RT</b> |                          |                          |
|-----------------------|--------------------------|--------------------------|
| <b>Gene</b>           | <b>Forward(5'-3')</b>    | <b>Reverse(5'-3')</b>    |
| PDGFR $\alpha$        | GGGATCCCGAGCGTGCTA       | CAGCTGAGGACCAGAAAGACC    |
| IL-17a                | TTTAACTCCCTTGCGCAAAA     | CTTCCCTCCGCATTGACAC      |
| IL-17f                | TGCTACTGTTGATGTTGGGAC    | AATGCCCTGGTTTTGGTTGAA    |
| IFN- $\gamma$         | ATGAACGCTACACACTGCATC    | CCATCCTTTTGCCAGTTCCTC    |
| GM-CSF                | GTGGTCTACAGCCTCTCAGCA    | GCATGTCATCCAGGAGGTTT     |
| IL1- $\beta$          | CTCTCCACCTCAATGGACAGA    | TGCTTGGGATCCACACTCTC     |
| IL-6                  | ACACATGTTCTCTGGGAAATCGT  | AAGTGCATCATCGTTGTTTCATAC |
| IL-5                  | TGTCCCTACTCATAAAAATCACCA | TCCGTCTCTCCTCGCCACAC     |
|                       | G                        |                          |
| IL-10                 | GCATGGCCAGAAATCAAGG      | GAGAAATCGATGACAGCGCC     |
| IL-11                 | CCTGGCAGACACACGGCAACT    | CTCGAAGCCTTGTCAGCACACC   |
| IL-22                 | GTGAGAAGCTAACGTCCATC     | GTCTACCTCTGGTCTCATGG     |
| IL-12p35              | CATCGATGAGCTGATGCAGT     | CAGATAGCCCATCACCTGT      |
| TGF- $\beta$          | CACTGATACGCCTGAGTG       | GTGAGCGCTGAATCGAAA       |

|               |                        |                         |
|---------------|------------------------|-------------------------|
| TNF- $\alpha$ | GACGTGGAAGCTGGCAGAAGAG | GCCACAAGCAGGAATGAGAAG   |
| iNOS          | ACCCACATCTGGCAGAATGAG  | AGCCATGACCTTTCGCATTAG   |
| IL-21         | GCACCGTCAAGGCTGAGAAC   | GGCATTAGCTATGTGCTTCTGTT |
| GAPDH         | CCAATGTGTCCGTCGTGGATCT | GTTGAAGTCGCAGGAGACAACC  |

---

40

41
